# Supplementary material
Source: Springer Nature journal article supplement (https://www.springermedizin.de/resource/supplementary/13098_2014_348_MOESM6_ESM.pdf/9671136)

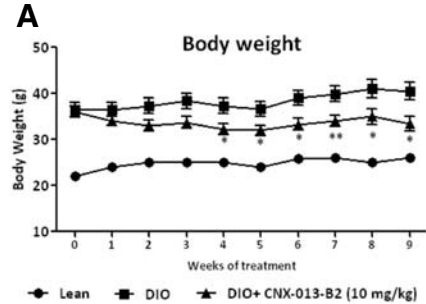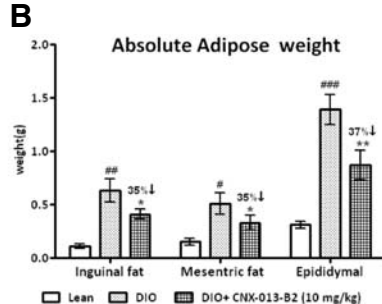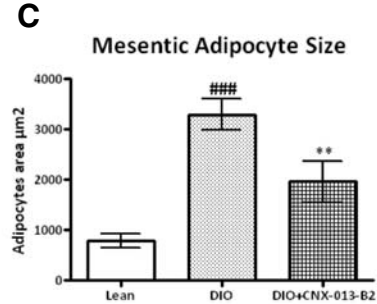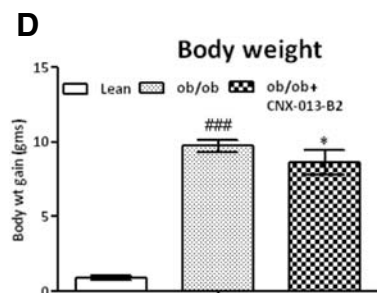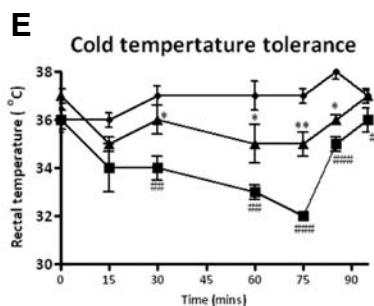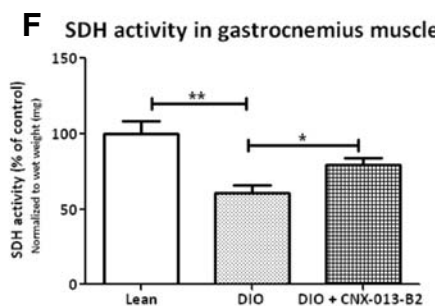

**G**

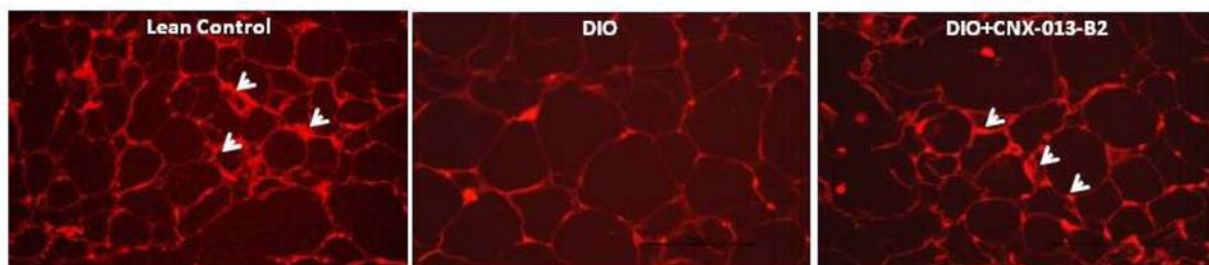

**H**

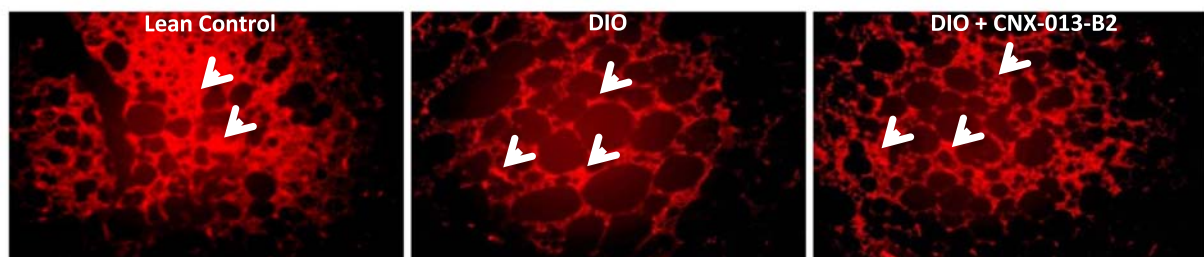

**I**

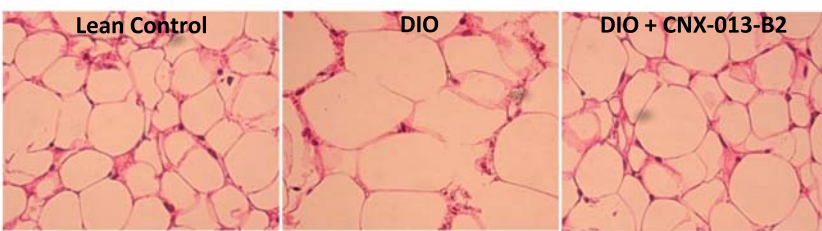

**J**

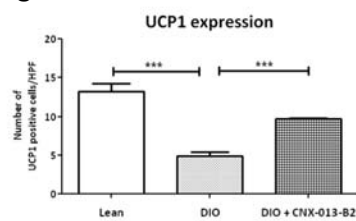

Supplement: MOESM6 [file 9671136]
